# Supplementary material for: Chemodiversity of Arctic Plant Dryas oxyodonta: LC-MS Profile and Antioxidant Activity
Source: MDPI journal article supplement (doi:10.3390/plants13060868), 2024-03-18
Supplement: s1 [file s1]

# Chemodiversity of Arctic Plant *Dryas oxyodonta*: LC-MS Profile and Antioxidant Activity

Nina I. Kashchenko <sup>1,\*</sup>, Daniil N. Olennikov <sup>1</sup> and Nadezhda K. Chirikova <sup>2</sup>

<sup>1</sup> Laboratory of Biomedical Research, Institute of General and Experimental Biology, Siberian Division, Russian Academy of Science, 6 Sakh'yanovoy Street, 670047 Ulan-Ude, Russia; olennikovdn@mail.ru

<sup>2</sup> Department of Biochemistry and Biotechnology, North-Eastern Federal University, 58 Belinsky Street, 677027 Yakutsk, Russia; hofnung@mail.ru

\* Correspondence: ninkk@mail.ru; Tel.: +7-983-421-73-40

---

## Content:

**Figure S1.** Structures of compounds identified in *Dryas oxyodonta*.

**Table S1.** Conditions for liquid chromatography mass spectrometry detection of metabolites in *Dryas oxyodonta* extracts

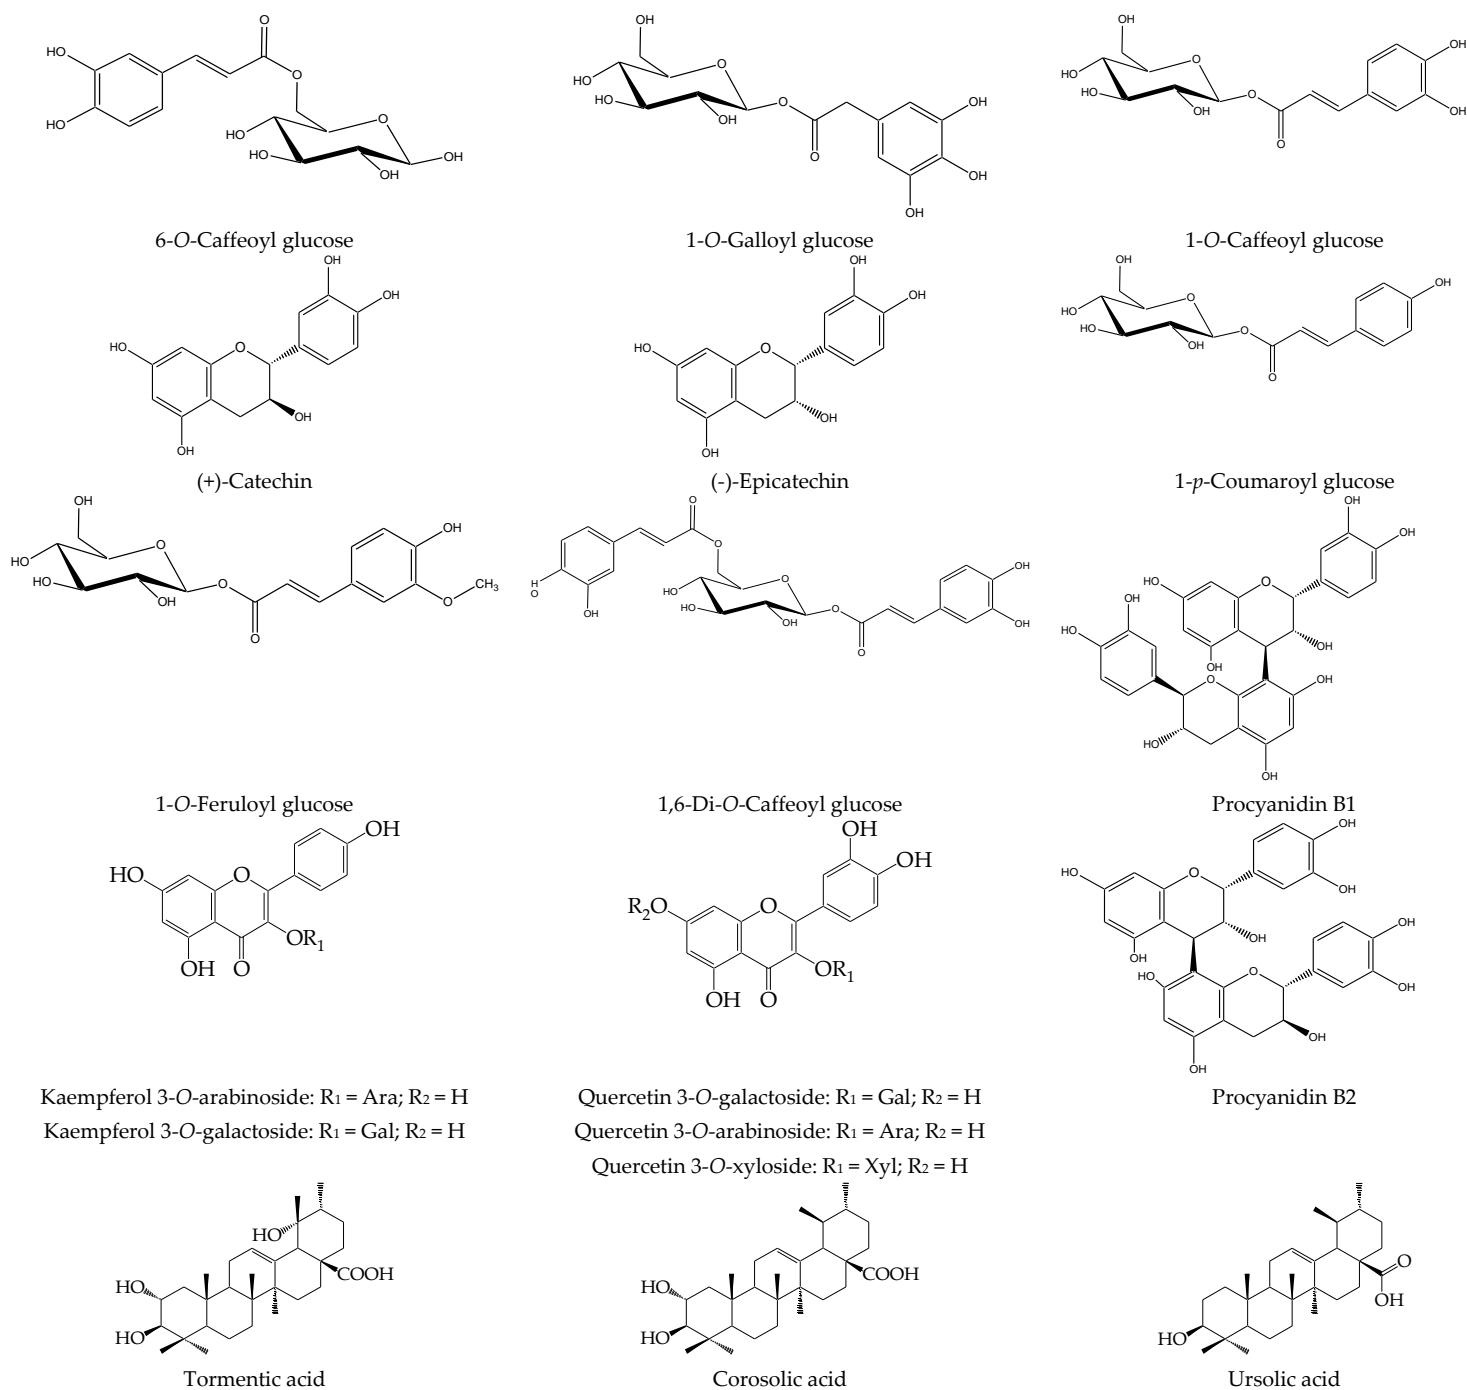

**Figure S1.** Structures of compounds identified in *Dryas oxydonta*. Abbreviation used: Gal – galactose; Ara – arabinose; Xyl – xylose.

**Table S1.** Conditions for liquid chromatography mass spectrometry detection of metabolites in *Dryas oxyodonta* extracts

|                                                    |                                                                                                                                                 |
|----------------------------------------------------|-------------------------------------------------------------------------------------------------------------------------------------------------|
| Liquid chromatograph                               | LC-20 Prominence liquid chromatograph (Shimadzu, Columbia, MD, USA)                                                                             |
| Photodiode array detector                          | SPD-M30A                                                                                                                                        |
| Mass spectrometer                                  | LCMS 8050 triple quadrupole                                                                                                                     |
| Column                                             | GLC Mastro column (2.1 × 150 mm, 3 µm; Shimadzu, Kyoto, Japan)                                                                                  |
| Eluents                                            | 0.25% formic acid in water (A) and 0.25% formic acid in acetonitrile (B)                                                                        |
| Gradient elution program                           | 0–3 min (5–9% B), 3–6 min (9–13% B), 6–10 min (13–35% B), 10–15 min (35–58% B), 15–18 min (58–79% B), 18–20 min (79–95% B), 20–25 min (95–5% B) |
| Injection volume                                   | 1 µL                                                                                                                                            |
| Flow rate                                          | 100 µL/min                                                                                                                                      |
| Column temperature                                 | 28 °C                                                                                                                                           |
| Spectral range of photodiode array detection       | 200–600 nm                                                                                                                                      |
| Mass spectrometric mode detection                  | Negative electrospray ionization                                                                                                                |
| Source voltage                                     | 3 kV                                                                                                                                            |
| Collision energy                                   | –35 eV                                                                                                                                          |
| Scanning range                                     | 100–2000 <i>m/z</i>                                                                                                                             |
| ESI interface temperature                          | 300 °C                                                                                                                                          |
| Desolvation line temperature                       | 250 °C                                                                                                                                          |
| Heat block temperature                             | 400 °C                                                                                                                                          |
| Flow rate of nebulizing gas N <sub>2</sub>         | 3 L/min                                                                                                                                         |
| Flow rate of heating gas                           | 10 L/min                                                                                                                                        |
| Flow rate of collision-induced dissociation gas Ar | 0.3 mL/min                                                                                                                                      |
